# Supplementary material for: Influence of the Type and Use of Soil on the Distribution of Organic Carbon and Other Soil Properties in a Sustainable and Resilient Agropolitan System
Source: MDPI journal article supplement (doi:10.3390/f14061085), 2023-05-24
Supplement: s1 [file s1]

**Table S1. Type, use and coordinates of soil samples**

| <b>Soil Sample</b> | <b>Latitude</b> | <b>Longitude</b> | <b>Soil Type</b> | <b>Use</b> |
|--------------------|-----------------|------------------|------------------|------------|
| 1                  | 38° 1' 34'' N   | 1° 11' 30'' W    | Regosol          | Industrial |
| 2                  | 38° 1' 24'' N   | 1° 12' 21'' W    | Regosol          | Industrial |
| 3                  | 38° 1' 16'' N   | 1° 12' 34'' W    | Fluvisol         | Abandoned  |
| 4                  | 38° 1' 20'' N   | 1° 13' 23'' W    | Fluvisol         | Cultivated |
| 5                  | 38° 1' 29'' N   | 1° 14' 5'' W     | Fluvisol         | Cultivated |
| 6                  | 38° 1' 23'' N   | 1° 15' 32'' W    | Fluvisol         | Cultivated |
| 7                  | 38° 1' 53'' N   | 1° 11' 18'' W    | Regosol          | Industrial |
| 8                  | 38° 2' 4'' N    | 1° 12' 32'' W    | Regosol          | Industrial |
| 9                  | 38° 1' 57'' N   | 1° 12' 42'' W    | Fluvisol         | Cultivated |
| 10                 | 38° 1' 58'' N   | 1° 13' 23'' W    | Fluvisol         | Cultivated |
| 11                 | 38° 1' 53'' N   | 1° 14' 8'' W     | Fluvisol         | Cultivated |
| 12                 | 38° 1' 58'' N   | 1° 14' 57'' W    | Regosol          | Industrial |
| 13                 | 38° 2' 28'' N   | 1° 11' 14'' W    | Regosol          | Industrial |
| 14                 | 38° 2' 29'' N   | 1° 12' 19'' W    | Regosol          | Industrial |
| 15                 | 38° 2' 38'' N   | 1° 12' 46'' W    | Fluvisol         | Cultivated |
| 16                 | 38° 2' 27'' N   | 1° 13' 26'' W    | Fluvisol         | Cultivated |
| 17                 | 38° 2' 32'' N   | 1° 14' 2'' W     | Fluvisol         | Cultivated |
| 18                 | 38° 2' 33'' N   | 1° 14' 52'' W    | Fluvisol         | Abandoned  |
| 19                 | 38° 2' 13'' N   | 1° 15' 06'' W    | Fluvisol         | Abandoned  |
| 20                 | 38° 2' 59'' N   | 1° 11' 34'' W    | Regosol          | Industrial |
| 21                 | 38° 2' 55'' N   | 1° 12' 10'' W    | Fluvisol         | Abandoned  |
| 22                 | 38° 2' 54'' N   | 1° 13' 23'' W    | Fluvisol         | Cultivated |
| 23                 | 38° 3' 8'' N    | 1° 14' 6'' W     | Fluvisol         | Abandoned  |
| 24                 | 38° 3' 7'' N    | 1° 15' 29'' W    | Fluvisol         | Abandoned  |
| 25                 | 38° 3' 35'' N   | 1° 11' 34'' W    | Regosol          | Industrial |
| 26                 | 38° 3' 23'' N   | 1° 13' 23'' W    | Fluvisol         | Abandoned  |
| 27                 | 38° 3' 16'' N   | 1° 14' 21'' W    | Fluvisol         | Abandoned  |
| 28                 | 38° 3' 31'' N   | 1° 14' 55'' W    | Fluvisol         | Cultivated |
| 29                 | 38° 3' 35'' N   | 1° 15' 24'' W    | Regosol          | Industrial |
| 30                 | 38° 4' 3'' N    | 1° 11' 35'' W    | Regosol          | Industrial |
| 31                 | 38° 4' 8'' N    | 1° 12' 34'' W    | Regosol          | Industrial |
| 32                 | 38° 3' 58'' N   | 1° 12' 39'' W    | Regosol          | Industrial |
| 33                 | 38° 4' 5'' N    | 1° 13' 19'' W    | Regosol          | Industrial |
| 34                 | 38° 4' 8'' N    | 1° 14' 0'' W     | Fluvisol         | Abandoned  |
| 35                 | 38° 3' 55'' N   | 1° 14' 3'' W     | Fluvisol         | Cultivated |
| 36                 | 38° 4' 0'' N    | 1° 15' 28'' W    | Regosol          | Abandoned  |
| 37                 | 38° 4' 42'' N   | 1° 11' 36'' W    | Regosol          | Industrial |
| 38                 | 38° 4' 37'' N   | 1° 11' 53'' W    | Regosol          | Industrial |
| 39                 | 38° 4' 36'' N   | 1° 12' 49'' W    | Regosol          | Industrial |
| 40                 | 38° 4' 34'' N   | 1° 13' 21'' W    | Regosol          | Industrial |

| Soil sample | Latitude      | Longitude     | Soil Type | Use        |
|-------------|---------------|---------------|-----------|------------|
| 41          | 38° 4' 39'' N | 1° 14' 12'' W | Fluvisol  | Cultivated |
| 42          | 38° 4' 36'' N | 1° 14' 47'' W | Fluvisol  | Cultivated |
| 43          | 38° 4' 41'' N | 1° 15' 22'' W | Fluvisol  | Cultivated |
| 44          | 38° 5' 14'' N | 1° 11' 19'' W | Regosol   | Industrial |
| 45          | 38° 5' 00'' N | 1° 12' 14'' W | Regosol   | Industrial |
| 46          | 38° 5' 11'' N | 1° 12' 48'' W | Regosol   | Industrial |
| 47          | 38° 5' 5'' N  | 1° 14' 02'' W | Regosol   | Industrial |
| 48          | 38° 5' 12'' N | 1° 14' 43'' W | Solonchak | Natural    |
| 49          | 38° 5' 14'' N | 1° 15' 24'' W | Fluvisol  | Cultivated |
| 50          | 38° 5' 35'' N | 1° 11' 28'' W | Regosol   | Industrial |
| 51          | 38° 5' 53'' N | 1° 12' 57'' W | Regosol   | Industrial |
| 52          | 38° 5' 42'' N | 1° 13' 12'' W | Regosol   | Industrial |
| 53          | 38° 5' 42'' N | 1° 13' 54'' W | Regosol   | Industrial |
| 54          | 38° 5' 43'' N | 1° 14' 38'' W | Regosol   | Industrial |
| 55          | 38° 5' 41'' N | 1° 15' 28'' W | Fluvisol  | Cultivated |
| 56          | 38° 6' 10'' N | 1° 11' 22'' W | Regosol   | Industrial |
| 57          | 38° 6' 15'' N | 1° 11' 58'' W | Regosol   | Industrial |
| 58          | 38° 6' 14'' N | 1° 12' 45'' W | Regosol   | Industrial |
| 59          | 38° 6' 14'' N | 1° 13' 27'' W | Regosol   | Industrial |
| 60          | 38° 6' 17'' N | 1° 13' 51'' W | Regosol   | Industrial |
| 61          | 38° 6' 14'' N | 1° 14' 42'' W | Fluvisol  | Abandoned  |
| 62          | 38° 6' 17'' N | 1° 15' 36'' W | Fluvisol  | Abandoned  |
| 63          | 30° 6' 42'' N | 1° 11' 18'' W | Fluvisol  | Cultivated |
| 64          | 38° 6' 50'' N | 1° 12' 00'' W | Regosol   | Industrial |
| 65          | 38° 6' 37'' N | 1° 12' 44'' W | Fluvisol  | Abandoned  |
| 66          | 38° 6' 48'' N | 1° 14' 03'' W | Fluvisol  | Abandoned  |
| 67          | 38° 6' 46'' N | 1° 14' 45'' W | Fluvisol  | Cultivated |
| 68          | 38° 6' 47'' N | 1° 15' 29'' W | Fluvisol  | Cultivated |

Table S2. General analysis of soil samples

| Soil sample | Hum. (%) | Density (g/cm <sup>3</sup> ) | CaCO <sub>3</sub> (g kg <sup>-1</sup> ) | OC (g kg <sup>-1</sup> ) | TN (g kg <sup>-1</sup> ) | P (mg kg <sup>-1</sup> ) | pH 1:5 |
|-------------|----------|------------------------------|-----------------------------------------|--------------------------|--------------------------|--------------------------|--------|
| 1           | 3,22     | 1,75                         | 400,4                                   | 5,9                      | 1,8                      | 7,06                     | 8,19   |
| 2           | 5,13     | 1,75                         | 188                                     | 5,6                      | 4,5                      | 4,71                     | 8,95   |
| 3           | 0,90     | 1,83                         | 315,9                                   | 7,1                      | 3,5                      | 51,45                    | 8,39   |
| 4           | 1,80     | 1,77                         | 258,1                                   | 11,4                     | 4,3                      | 52,13                    | 8,78   |
| 5           | 5,21     | 1,96                         | 327,6                                   | 16,7                     | 5,5                      | 15,15                    | 8,98   |
| 6           | 2,40     | 1,80                         | 407,3                                   | 1,3                      | 6,1                      | 16,28                    | 9,01   |
| 7           | 3,95     | 1,79                         | 269,9                                   | 1,4                      | 3,1                      | 5,70                     | 8,22   |
| 8           | 3,40     | 1,76                         | 356,4                                   | 2,6                      | 3,8                      | 7,25                     | 9,04   |
| 9           | 5,84     | 1,88                         | 317,6                                   | 8,9                      | 3,5                      | 23,07                    | 8,82   |
| 10          | 0,66     | 1,88                         | 292,8                                   | 4,6                      | 2,1                      | 6,07                     | 8,79   |
| 11          | 1,44     | 1,76                         | 320,3                                   | 11,7                     | 4,4                      | 24,19                    | 8,51   |
| 12          | 1,05     | 1,79                         | 406,4                                   | 10,6                     | 3,6                      | 24,48                    | 8,98   |
| 13          | 2,41     | 1,61                         | 265,4                                   | 4,1                      | 1,6                      | 7,77                     | 8,52   |
| 14          | 1,05     | 1,70                         | 343,1                                   | 3,7                      | 1,2                      | 5,61                     | 8,32   |
| 15          | 1,47     | 1,75                         | 362,6                                   | 10,6                     | 3,4                      | 28,08                    | 8,61   |
| 16          | 8,25     | 1,85                         | 234,1                                   | 8,3                      | 3,5                      | 41,28                    | 8,39   |
| 17          | 2,01     | 1,84                         | 238,6                                   | 16,7                     | 3,7                      | 50,77                    | 8,65   |
| 18          | 1,46     | 1,81                         | 447,6                                   | 13,8                     | 2,8                      | 8,19                     | 8,85   |
| 19          | 1,79     | 1,91                         | 353,5                                   | 5,2                      | 2,1                      | 21,24                    | 9,04   |
| 20          | 7,36     | 1,69                         | 271,9                                   | 6,2                      | 1,5                      | 6,79                     | 8,17   |
| 21          | 1,28     | 1,84                         | 284,5                                   | 2,0                      | 1,2                      | 8,58                     | 8,84   |
| 22          | 1,36     | 1,91                         | 348,5                                   | 7,9                      | 2,4                      | 44,71                    | 8,53   |
| 23          | 1,97     | 1,86                         | 345,9                                   | 13,8                     | 3,3                      | 33,51                    | 8,05   |
| 24          | 6,75     | 1,98                         | 288,2                                   | 3,8                      | 1,7                      | 10,06                    | 7,90   |
| 25          | 3,12     | 1,72                         | 351,4                                   | 2,7                      | 1,5                      | 9,00                     | 7,98   |
| 26          | 3,44     | 1,80                         | 319,6                                   | 8,7                      | 2,3                      | 25,96                    | 8,53   |
| 27          | 6,67     | 1,86                         | 326,8                                   | 14,4                     | 3,5                      | 43,5                     | 8,38   |
| 28          | 2,40     | 1,78                         | 408,3                                   | 15,4                     | 3,3                      | 8,97                     | 8,51   |
| 29          | 1,76     | 1,74                         | 460,9                                   | 3,8                      | 0,9                      | 4,25                     | 8,95   |
| 30          | 5,01     | 1,76                         | 340,5                                   | 0,4                      | 1,3                      | 5,16                     | 8,28   |
| 31          | 5,00     | 1,97                         | 373,6                                   | 3,6                      | 2,0                      | 6,40                     | 7,94   |
| 32          | 3,40     | 1,76                         | 401,1                                   | 3,2                      | 1,3                      | 6,41                     | 8,09   |
| 33          | 5,17     | 1,71                         | 410,2                                   | 1,3                      | 1,3                      | 5,06                     | 8,39   |
| 34          | 4,22     | 1,83                         | 359,1                                   | 10,5                     | 2,2                      | 8,11                     | 8,73   |
| 35          | 5,28     | 1,80                         | 318,1                                   | 9,1                      | 2,4                      | 23,38                    | 8,71   |
| 36          | 6,31     | 1,96                         | 402,4                                   | 8,9                      | 2,0                      | 21,88                    | 8,83   |
| 37          | 3,80     | 1,91                         | 183,4                                   | 19,4                     | 2,9                      | 57,47                    | 8,38   |
| 38          | 6,24     | 1,95                         | 265,9                                   | 5,2                      | 1,3                      | 5,33                     | 8,58   |
| 39          | 8,92     | 1,80                         | 456,7                                   | 4,6                      | 1,5                      | 5,26                     | 8,04   |
| 40          | 6,32     | 1,84                         | 387                                     | 8,8                      | 2,1                      | 19,59                    | 8,73   |

| Soil<br>sample | Hum.<br>(%) | Density<br>(g/cm <sup>3</sup> ) | CaCO <sub>3</sub><br>(g kg <sup>-1</sup> ) | OC<br>(g kg <sup>-1</sup> ) | TN<br>(g kg <sup>-1</sup> ) | P<br>(mg kg <sup>-1</sup> ) | pH 1:5 |
|----------------|-------------|---------------------------------|--------------------------------------------|-----------------------------|-----------------------------|-----------------------------|--------|
| 41             | 3,90        | 1,84                            | 387,5                                      | 11,6                        | 2,5                         | 30,85                       | 8,55   |
| 42             | 5,23        | 1,89                            | 321,7                                      | 14,7                        | 2,7                         | 25,40                       | 8,04   |
| 43             | 2,96        | 1,86                            | 323,7                                      | 17,1                        | 2,6                         | 53,46                       | 8,38   |
| 44             | 2,85        | 1,76                            | 372,8                                      | 1,8                         | 1,0                         | 4,68                        | 8,56   |
| 45             | 6,53        | 1,65                            | 251,1                                      | 0,4                         | 1,1                         | 4,46                        | 7,82   |
| 46             | 1,71        | 1,72                            | 340,8                                      | 2,6                         | 1,2                         | 8,65                        | 7,87   |
| 47             | 1,96        | 1,77                            | 349,6                                      | 6,0                         | 1,3                         | 7,10                        | 7,89   |
| 48             | 1,84        | 1,99                            | 324,1                                      | 7,3                         | 1,0                         | 33,76                       | 8,54   |
| 49             | 2,90        | 1,83                            | 350,6                                      | 12,2                        | 2,5                         | 31,44                       | 8,19   |
| 50             | 8,73        | 1,85                            | 451,3                                      | 2,8                         | 0,6                         | 4,76                        | 8,12   |
| 51             | 7,27        | 1,82                            | 402,2                                      | 3,2                         | 2,5                         | 17,23                       | 8,80   |
| 52             | 1,98        | 1,87                            | 270,9                                      | 2,7                         | 1,4                         | 4,76                        | 7,70   |
| 53             | 3,30        | 1,79                            | 415,3                                      | 4,5                         | 1,5                         | 5,76                        | 8,93   |
| 54             | 5,09        | 1,79                            | 398,6                                      | 4,4                         | 1,4                         | 6,50                        | 8,27   |
| 55             | 5,31        | 1,87                            | 418                                        | 14,0                        | 2,7                         | 33,48                       | 8,62   |
| 56             | 9,46        | 1,83                            | 371,9                                      | 2,7                         | 1,9                         | 7,37                        | 8,01   |
| 57             | 2,18        | 1,93                            | 418,8                                      | 4,7                         | 1,5                         | 6,43                        | 7,86   |
| 58             | 0,71        | 1,74                            | 513,3                                      | 6,2                         | 1,4                         | 6,87                        | 8,58   |
| 59             | 1,35        | 1,77                            | 425,1                                      | 2,2                         | 2,3                         | 11,60                       | 8,38   |
| 60             | 2,46        | 1,79                            | 415,3                                      | 2,6                         | 2,4                         | 7,56                        | 8,08   |
| 61             | 4,94        | 1,92                            | 417,1                                      | 11,0                        | 2,0                         | 11,59                       | 8,81   |
| 62             | 5,23        | 1,96                            | 385,2                                      | 14,5                        | 2,6                         | 19,55                       | 8,90   |
| 63             | 4,19        | 1,80                            | 367,9                                      | 1,9                         | 2,7                         | 13,38                       | 8,13   |
| 64             | 3,25        | 1,79                            | 423,3                                      | 3,2                         | 1,5                         | 4,75                        | 8,04   |
| 65             | 0,94        | 1,78                            | 422,8                                      | 3,4                         | 1,7                         | 7,40                        | 8,37   |
| 66             | 3,38        | 1,79                            | 413,9                                      | 5,0                         | 2,0                         | 20,08                       | 8,16   |
| 67             | 3,85        | 1,89                            | 443                                        | 5,7                         | 3,0                         | 22,20                       | 8,24   |
| 68             | 2,65        | 1,77                            | 482,8                                      | 12,5                        | 2,0                         | 22,91                       | 8,64   |

Table S3. Granulometric analysis of soil samples. (ND= Not dispersed)

| Soil sample | Clay (%) | Fine silt (%) | Coarse silt (%) | 0.1-0.05 mm (%) | 0.25-0.1 mm (%) | 0.5-0.25 mm (%) | 1-0.5 mm (%) | Sand (%) | Texture                    |
|-------------|----------|---------------|-----------------|-----------------|-----------------|-----------------|--------------|----------|----------------------------|
| 1           | 13,1     | 40,9          | 13,2            | 7,8             | 12,0            | 5,7             | 3,2          | 32,7     | Silty loam                 |
| 2           | -2,3     | 46,5          | 14,6            | 10,9            | 12,5            | 9,5             | 4,6          | 41,2     | ND                         |
| 3           | 20,1     | 35,8          | 16,9            | 18,6            | 6,7             | 0,5             | 0,1          | 27,2     | Silty loam                 |
| 4           | 30,7     | 34,0          | 8,1             | 10,5            | 9,2             | 3,8             | 2,0          | 27,2     | Clayey loam                |
| 5           | 31,5     | 39,2          | 13,7            | 5,9             | 5,2             | 2,4             | 1,2          | 15,6     | Clay silt loam             |
| 6           | 26,2     | 32,7          | 9,5             | 9,9             | 10,9            | 5,7             | 2,9          | 31,7     | Loam                       |
| 7           | 2,0      | 76,2          | 4,6             | 4,7             | 5,3             | 4,0             | 1,6          | 17,3     | ND                         |
| 8           | 38,4     | 37,7          | 12,4            | 5,8             | 2,9             | 1,5             | 0,7          | 11,5     | Clay silt loam             |
| 9           | 33,7     | 47,1          | 14,0            | 2,0             | 1,3             | 0,9             | 0,6          | 5,2      | Clay silt loam             |
| 10          | 15,0     | 20,3          | 25,4            | 27,3            | 10,5            | 1,1             | 0,3          | 39,4     | Loam                       |
| 11          | 30,5     | 34,8          | 7,9             | 7,9             | 7,2             | 4,9             | 3,7          | 26,8     | Clayey loam                |
| 12          | 17,3     | 18,8          | 17,0            | 15,2            | 17,8            | 11,1            | 1,7          | 46,8     | Loam                       |
| 13          | 18,4     | 21,6          | 12,2            | 9,9             | 9,4             | 10,7            | 8,4          | 47,8     | Loam                       |
| 14          | 29,7     | 22,4          | 5,0             | 8,5             | 15,4            | 10,9            | 4,5          | 42,8     | Clayey loam                |
| 15          | 27,7     | 28,4          | 16,3            | 10,3            | 6,9             | 3,9             | 2,6          | 27,6     | Clayey loam                |
| 16          | 28,7     | 32,5          | 18,1            | 4,3             | 5,8             | 3,7             | 3,2          | 20,8     | Clayey loam<br>Clayey silt |
| 17          | 38,0     | 33,4          | 10,5            | 5,8             | 6,0             | 2,9             | 1,7          | 18,1     | Loam                       |
| 18          | 25,4     | 25,2          | 11,0            | 11,6            | 11,9            | 7,0             | 3,8          | 38,3     | Loam                       |
| 19          | 24,7     | 25,3          | 16,3            | 15,6            | 9,4             | 4,3             | 2,4          | 33,7     | Loam                       |
| 20          | 2,5      | 75,5          | 1,9             | 5,3             | 6,8             | 5,8             | 1,2          | 20,0     | ND                         |
| 21          | 21,0     | 24,5          | 18,3            | 15,8            | 10,2            | 4,5             | 2,6          | 36,2     | Loam                       |
| 22          | 35,3     | 32,3          | 13,3            | 8,5             | 4,7             | 2,6             | 1,7          | 19,0     | Clay silt loam             |
| 23          | 44,0     | 44,2          | 1,1             | 3,2             | 2,3             | 1,9             | 1,8          | 10,8     | Clay silty                 |
| 24          | 2,1      | 7,4           | 59,4            | 11,2            | 9,7             | 4,8             | 2,6          | 31,0     | ND                         |
| 25          | 3,6      | 56,3          | 8,4             | 8,2             | 8,6             | 6,3             | 2,9          | 31,8     | ND                         |
| 26          | 38,1     | 39,2          | 7,4             | 4,9             | 5,0             | 2,8             | 1,4          | 15,3     | Clay silt loam             |
| 27          | 38,2     | 40,0          | 7,1             | 5,9             | 3,8             | 2,3             | 1,5          | 14,7     | Clay silt loam             |
| 28          | 27,5     | 29,5          | 6,9             | 9,2             | 8,7             | 8,2             | 4,7          | 36,1     | Clayey loam                |
| 29          | 6,5      | 35,3          | 17,2            | 8,2             | 16,2            | 10,1            | 2,6          | 40,9     | Silty loam                 |
| 30          | 2,8      | 68,9          | 4,6             | 8,3             | 7,6             | 4,6             | 2,1          | 23,8     | ND                         |
| 31          | 5,8      | 43,1          | 47,5            | 0,5             | 0,7             | 1,0             | 0,9          | 3,5      | ND                         |
| 32          | 3,1      | 66,0          | 12,1            | 10,0            | 4,7             | 1,6             | 1,1          | 18,7     | ND                         |
| 33          | 3,9      | 70,7          | 12,1            | 7,8             | 2,5             | 1,1             | 1,0          | 13,2     | ND                         |
| 34          | 44,7     | 40,9          | 7,8             | 2,8             | 1,6             | 1,2             | 0,7          | 6,7      | Clay silty                 |
| 35          | 29,6     | 34,6          | 9,2             | 11,9            | 6,9             | 4,0             | 2,1          | 26,6     | Clayey loam                |
| 36          | 30,8     | 40,9          | 14,1            | 6,3             | 2,9             | 2,1             | 1,5          | 14,2     | Clay silt loam             |
| 37          | 21,0     | 17,4          | 1,9             | 11,3            | 16,7            | 15,4            | 8,3          | 59,7     | Clay sand loam             |
| 38          | 37,7     | 34,0          | 14,6            | 6,3             | 3,2             | 1,9             | 1,2          | 13,6     | Clay silt loam             |
| 39          | 24,6     | 41,8          | 9,8             | 11,0            | 8,5             | 1,7             | 1,1          | 23,8     | Silty loam<br>Clayey silt  |
| 40          | 38,1     | 36,5          | 6,2             | 9,7             | 3,9             | 2,2             | 2,0          | 19,2     | loam                       |

| Soil sample | Clay (%) | Fine silt (%) | Coarse silt (%) | 0.1-0.05 mm (%) | 0.25-0.1 mm (%) | 0.5-0.25 mm (%) | 1-0.5 mm (%) | Sand (%) | Texture        |
|-------------|----------|---------------|-----------------|-----------------|-----------------|-----------------|--------------|----------|----------------|
| 41          | 68,0     | 7,5           | 5,2             | 8,4             | 4,6             | 2,4             | 2,2          | 19,4     | Clayey         |
| 42          | 27,3     | 34,7          | 14,9            | 10,8            | 6,6             | 2,2             | 1,8          | 23,1     | Loam           |
| 43          | 0,5      | 60,9          | 22,6            | 2,1             | 6,8             | 3,5             | 1,9          | 15,9     | ND             |
| 44          | 3,1      | 57,0          | 12,8            | 9,5             | 7,8             | 5,7             | 2,0          | 27,1     | ND             |
| 45          | 1,6      | 58,8          | 6,0             | 7,3             | 10,5            | 7,2             | 4,8          | 33,6     | ND             |
| 46          | 2,4      | 61,3          | 11,9            | 5,8             | 10,7            | 4,1             | 2,2          | 24,4     | ND             |
| 47          | 3,3      | 56,9          | 15,0            | 6,1             | 10,5            | 3,5             | 3,1          | 24,8     | ND             |
| 48          | 9,5      | 14,0          | 65,7            | 5,6             | 2,6             | 1,3             | 0,7          | 10,8     | ND             |
| 49          | 30,3     | 30,8          | 8,4             | 9,4             | 7,4             | 4,7             | 2,5          | 30,5     | Clayey loam    |
| 50          | 34,5     | 28,4          | 9,2             | 10,6            | 8,6             | 4,2             | 2,2          | 27,9     | Clayey loam    |
| 51          | 2,7      | 57,6          | 9,7             | 12,0            | 9,2             | 5,2             | 3,2          | 30,0     | ND             |
| 52          | 0,5      | 45,2          | 47,6            | 1,5             | 1,4             | 1,5             | 1,2          | 6,7      | ND             |
| 53          | 33,6     | 38,2          | 6,6             | 4,7             | 6,9             | 5,1             | 2,3          | 21,4     | Clayey loam    |
| 54          | 32,9     | 44,2          | 8,6             | 5,0             | 3,0             | 2,5             | 2,3          | 14,2     | Clay silt loam |
| 55          | 15,3     | 71,2          | 5,7             | 3,3             | 1,5             | 1,1             | 0,9          | 7,7      | Silty loam     |
| 56          | 35,9     | 37,9          | 4,7             | 8,9             | 6,2             | 3,3             | 1,7          | 21,5     | Clayey loam    |
| 57          | 30,6     | 29,9          | 28,0            | 4,9             | 2,5             | 1,6             | 1,5          | 11,6     | Clay silt loam |
| 58          | 23,8     | 16,2          | 15,2            | 11,9            | 13,3            | 10,4            | 4,8          | 44,8     | Loam           |
| 59          | 30,5     | 31,9          | 6,8             | 5,4             | 5,9             | 7,3             | 7,2          | 30,8     | Clayey loam    |
| 60          | 42,7     | 35,6          | 7,5             | 3,6             | 2,9             | 3,1             | 2,6          | 14,2     | Clay silty     |
| 61          | 36,9     | 40,7          | 9,7             | 4,4             | 2,2             | 3,4             | 1,8          | 12,7     | Clay silt loam |
| 62          | 31,9     | 35,9          | 14,4            | 7,6             | 3,1             | 2,2             | 3,2          | 17,8     | Clay silt loam |
| 63          | 33,8     | 35,0          | 10,5            | 9,8             | 6,7             | 3,1             | 0,6          | 20,7     | Clayey loam    |
| 64          | 32,4     | 33,9          | 10,0            | 9,9             | 6,6             | 3,5             | 1,9          | 23,6     | Clayey loam    |
| 65          | 21,4     | 20,2          | 8,6             | 13,6            | 16,7            | 12,7            | 4,4          | 49,7     | Loam           |
| 66          | 34,7     | 35,6          | 13,1            | 8,6             | 3,1             | 2,0             | 1,7          | 16,6     | Clay silt loam |
| 67          | 23,4     | 25,8          | 18,1            | 17,8            | 8,6             | 4,2             | 1,1          | 32,7     | Loam           |
| 68          | 15,4     | 18,2          | 12,0            | 6,5             | 8,7             | 15,7            | 13,5         | 54,5     | Clayey loam    |

**Table S4. Exchange capacity and bases of exchange in soil samples**

| Soil sample | CEC<br>(mE/100g) | K <sup>+</sup><br>(mg/100g) | Mg <sup>2+</sup><br>(mg/100g) | Na <sup>+</sup><br>(mg/100g) |
|-------------|------------------|-----------------------------|-------------------------------|------------------------------|
| 1           | 15,76            | 5,97                        | 105,78                        | 236,05                       |
| 2           | 16,89            | 29,53                       | 16,70                         | 14,65                        |
| 3           | 16,61            | 43,88                       | 42,00                         | 25,70                        |
| 4           | 19,71            | 34,98                       | 79,88                         | 28,38                        |
| 5           | 13,79            | 102,98                      | 54,80                         | 13,87                        |
| 6           | 17,73            | 65,18                       | 59,03                         | 14,13                        |
| 7           | 21,11            | 45,13                       | 48,21                         | 82,05                        |
| 8           | 20,83            | 22,53                       | 80,15                         | 21,16                        |
| 9           | 12,67            | 35,48                       | 62,85                         | 31,28                        |
| 10          | 18,30            | 23,77                       | 35,83                         | 35,45                        |
| 11          | 12,95            | 41,33                       | 63,05                         | 38,30                        |
| 12          | 8,45             | 40,33                       | 31,95                         | 16,92                        |
| 13          | 5,63             | 17,93                       | 37,90                         | 31,30                        |
| 14          | 10,13            | 34,73                       | 37,63                         | 16,25                        |
| 15          | 14,08            | 30,23                       | 52,43                         | 20,87                        |
| 16          | 12,10            | 28,90                       | 58,10                         | 25,18                        |
| 17          | 17,73            | 55,68                       | 117,25                        | 81,73                        |
| 18          | 10,70            | 30,18                       | 26,75                         | 10,36                        |
| 19          | 12,95            | 50,35                       | 41,60                         | 18,50                        |
| 20          | 14,92            | 23,84                       | 20,64                         | 12,78                        |
| 21          | 8,45             | 20,71                       | 24,06                         | 8,74                         |
| 22          | 15,20            | 46,08                       | 75,38                         | 35,30                        |
| 23          | 18,86            | 77,20                       | 79,30                         | 13,90                        |
| 24          | 10,13            | 16,62                       | 8,81                          | 11,21                        |
| 25          | 11,26            | 29,78                       | 24,95                         | 17,37                        |
| 26          | 18,58            | 33,05                       | 58,05                         | 15,12                        |
| 27          | 21,11            | 53,73                       | 66,88                         | 10,39                        |
| 28          | 15,48            | 25,93                       | 48,45                         | 13,83                        |
| 29          | 11,26            | 11,02                       | 21,14                         | 10,74                        |
| 30          | 12,10            | 24,67                       | 61,55                         | 76,00                        |
| 31          | 23,93            | 23,45                       | 31,23                         | 8,07                         |
| 32          | 13,23            | 23,19                       | 27,10                         | 7,14                         |
| 33          | 14,92            | 58,48                       | 72,00                         | 55,20                        |
| 34          | 17,45            | 31,53                       | 55,03                         | 19,79                        |
| 35          | 14,92            | 27,95                       | 47,80                         | 11,67                        |
| 36          | 15,48            | 35,55                       | 50,20                         | 15,48                        |
| 37          | 14,08            | 45,38                       | 22,71                         | 9,07                         |
| 38          | 14,64            | 25,63                       | 36,90                         | 26,13                        |
| 39          | 13,23            | 15,82                       | 22,42                         | 9,81                         |
| 40          | 14,08            | 35,80                       | 40,33                         | 11,57                        |

| Soil sample | CEC<br>(mE/100g) | K <sup>+</sup><br>(mg/100g) | Mg <sup>2+</sup><br>(mg/100g) | Na <sup>+</sup><br>(mg/100g) |
|-------------|------------------|-----------------------------|-------------------------------|------------------------------|
| 41          | 11,54            | 53,03                       | 37,85                         | 9,73                         |
| 42          | 15,76            | 41,65                       | 62,98                         | 15,99                        |
| 43          | 18,30            | 24,78                       | 65,25                         | 120,00                       |
| 44          | 9,29             | 19,89                       | 52,48                         | 15,63                        |
| 45          | 11,26            | 10,78                       | 15,33                         | 9,61                         |
| 46          | 15,48            | 27,15                       | 21,08                         | 16,74                        |
| 47          | 9,85             | 27,15                       | 21,08                         | 16,74                        |
| 48          | 12,67            | 32,25                       | 145,45                        | 1215,00                      |
| 49          | 16,33            | 23,20                       | 58,55                         | 19,46                        |
| 50          | 10,70            | 14,72                       | 26,75                         | 10,66                        |
| 51          | 11,82            | 29,75                       | 37,08                         | 18,51                        |
| 52          | 10,42            | 12,13                       | 9,59                          | 8,44                         |
| 53          | 16,61            | 12,86                       | 29,30                         | 75,95                        |
| 54          | 11,54            | 10,43                       | 15,96                         | 25,58                        |
| 55          | 18,30            | 39,83                       | 59,20                         | 22,99                        |
| 56          | 14,08            | 20,05                       | 56,30                         | 92,88                        |
| 57          | 12,67            | 14,65                       | 17,45                         | 15,12                        |
| 58          | 7,04             | 7,77                        | 12,43                         | 16,74                        |
| 59          | 12,67            | 12,14                       | 35,83                         | 28,95                        |
| 60          | 16,05            | 14,64                       | 42,23                         | 49,05                        |
| 61          | 17,73            | 20,47                       | 65,88                         | 21,26                        |
| 62          | 16,89            | 45,50                       | 62,53                         | 35,58                        |
| 63          | 13,23            | 48,58                       | 39,20                         | 70,58                        |
| 64          | 11,26            | 13,84                       | 15,82                         | 12,84                        |
| 65          | 7,88             | 11,16                       | 17,70                         | 12,14                        |
| 66          | 13,23            | 33,93                       | 27,18                         | 15,09                        |
| 67          | 9,01             | 26,08                       | 59,70                         | 90,13                        |
| 68          | 7,32             | 8,89                        | 28,50                         | 13,35                        |



Table S5. Available and total metals

| Sample soil | Cd (avail.)<br>(mg/kg) | Cu (avail.)<br>(mg/kg) | Fe (avail.)<br>(mg/kg) | Mn (avail.)<br>(mg/kg) | Pb (avail.)<br>(mg/kg) | Zn (avail.)<br>(mg/kg) | Cd (total)<br>(mg/kg) | Cu (total)<br>(mg/kg) | Fe (total)<br>(mg/kg) | Mn (total)<br>(mg/kg) | Pb (total)<br>(mg/kg) | Zn (total)<br>(mg/kg) |
|-------------|------------------------|------------------------|------------------------|------------------------|------------------------|------------------------|-----------------------|-----------------------|-----------------------|-----------------------|-----------------------|-----------------------|
| 1           | <0,1                   | 3,448                  | 0,310                  | 4,978                  | 0,824                  | 1,224                  | <0,5                  | 445,046               | 14765,849             | 171,233               | <0,5                  | 42,768                |
| 2           | <0,1                   | 2,402                  | 0,924                  | 9,950                  | 1,652                  | 1,230                  | <0,5                  | 117,880               | 11238,825             | 179,438               | <0,5                  | 32,695                |
| 3           | <0,1                   | 4,486                  | 6,168                  | 11,810                 | 3,222                  | 4,278                  | <0,5                  | 79,621                | 13116,449             | 272,829               | <0,5                  | 52,498                |
| 4           | <0,1                   | 2,914                  | 0,890                  | 13,638                 | 5,486                  | 3,712                  | <0,5                  | 751,049               | 13874,126             | 301,818               | <0,5                  | 167,972               |
| 5           | <0,1                   | 2,370                  | 2,172                  | 11,018                 | 1,244                  | 1,250                  | <0,5                  | 234,224               | 11415,915             | 266,553               | <0,5                  | 93,177                |
| 6           | <0,1                   | 16,274                 | 3,508                  | 13,244                 | 2,056                  | 3,604                  | <0,5                  | 164,952               | 12464,920             | 242,438               | <0,5                  | 78,188                |
| 7           | <0,1                   | 2,198                  | 0,384                  | 3,156                  | 1,630                  | 1,284                  | <0,5                  | 83,833                | 12204,462             | 265,734               | <0,5                  | 51,865                |
| 8           | <0,1                   | 1,446                  | 0,674                  | 2,322                  | 0,940                  | 0,442                  | <0,5                  | 91,516                | 11912,428             | 200,660               | <0,5                  | 35,496                |
| 9           | <0,1                   | 3,126                  | 0,950                  | 1,992                  | 3,138                  | 1,530                  | <0,5                  | 66,260                | 12487,805             | 253,171               | <0,5                  | 43,659                |
| 10          | <0,1                   | 4,468                  | 1,912                  | 5,678                  | 1,116                  | 0,946                  | <0,5                  | 47,654                | 9723,872              | 234,115               | <0,5                  | 29,617                |
| 11          | <0,1                   | 4,212                  | 1,086                  | 6,110                  | 5,968                  | 3,374                  | <0,5                  | 87,798                | 12495,916             | 270,336               | <0,5                  | 69,177                |
| 12          | <0,1                   | 1,404                  | 2,874                  | 7,968                  | 1,068                  | 1,562                  | <0,5                  | 48,310                | 7956,792              | 183,913               | <0,5                  | 38,186                |
| 13          | <0,1                   | 1,838                  | 0,570                  | 1,974                  | 3,878                  | 3,760                  | <0,5                  | 44,375                | 13032,003             | 283,570               | <0,5                  | 42,808                |
| 14          | <0,1                   | 1,450                  | 0,376                  | 4,378                  | 0,652                  | 0,472                  | <0,5                  | 35,586                | 10209,424             | 207,624               | <0,5                  | 27,487                |
| 15          | <0,1                   | 2,674                  | 1,092                  | 9,462                  | 8,188                  | 2,188                  | <0,5                  | 34,624                | 8393,502              | 176,813               | <0,5                  | <0,5                  |
| 16          | <0,1                   | 7,370                  | 2,366                  | 1,860                  | 2,130                  | 3,002                  | <0,5                  | 43,979                | 13510,224             | 267,364               | <0,5                  | 45,683                |
| 17          | <0,1                   | 3,880                  | 0,880                  | 16,434                 | 49,540                 | 2,500                  | <0,5                  | 42,071                | 13535,599             | 284,709               | 170,712               | 60,113                |
| 18          | <0,1                   | 4,982                  | 4,094                  | 16,836                 | 2,148                  | 2,004                  | <0,5                  | 38,493                | 9870,340              | 200,891               | <0,5                  | <0,5                  |
| 19          | <0,1                   | 9,146                  | 3,126                  | 6,558                  | 3,906                  | 3,224                  | <0,5                  | 46,810                | 10393,168             | 177,570               | <0,5                  | <0,5                  |
| 20          | <0,1                   | 1,178                  | 0,358                  | 4,288                  | 0,634                  | 0,850                  | <0,5                  | <0,5                  | 9798,387              | 174,194               | <0,5                  | <0,5                  |
| 21          | <0,1                   | 0,410                  | 1,128                  | 3,944                  | 0,624                  | 1,234                  | <0,5                  | 63,289                | 14608,287             | 264,892               | <0,5                  | 39,900                |
| 22          | <0,1                   | 11,718                 | 1,240                  | 10,890                 | 3,958                  | 1,814                  | <0,5                  | 100,675               | 12986,503             | 250,706               | <0,5                  | 61,205                |
| 23          | <0,1                   | 14,534                 | 1,050                  | 18,370                 | 3,872                  | 2,804                  | <0,5                  | 54,993                | 15217,037             | 256,691               | <0,5                  | 36,064                |
| 24          | <0,1                   | 17,712                 | 0,496                  | 4,044                  | 0,718                  | 0,716                  | <0,5                  | 97,753                | 8274,478              | 155,538               | <0,5                  | 36,356                |
| 25          | <0,1                   | 1,710                  | 0,412                  | 1,028                  | 3,496                  | 2,710                  | <0,5                  | 49,558                | 10435,780             | 225,016               | <0,5                  | 47,182                |

| Soil Sample | Cd (avail.)<br>(mg/kg) | Cu (avail.)<br>(mg/kg) | Fe (avail.)<br>(mg/kg) | Mn (avail.)<br>(mg/kg) | Pb (avail.)<br>(mg/kg) | Zn (avail.)<br>(mg/kg) | Cd (total)<br>(mg/kg) | Cu (total)<br>(mg/kg) | Fe (total)<br>(mg/kg) | Mn (total)<br>(mg/kg) | Pb (total)<br>(mg/kg) | Zn (total)<br>(mg/kg) |
|-------------|------------------------|------------------------|------------------------|------------------------|------------------------|------------------------|-----------------------|-----------------------|-----------------------|-----------------------|-----------------------|-----------------------|
| 26          | <0,1                   | 2,950                  | 0,664                  | 7,852                  | 5,220                  | 1,188                  | <0,5                  | 41,859                | 14687,913             | 238,028               | <0,5                  | 42,355                |
| 27          | <0,1                   | 4,348                  | 1,862                  | 2,864                  | 3,768                  | 5,416                  | <0,5                  | 41,129                | 16451,506             | 241,311               | <0,5                  | 59,831                |
| 28          | <0,1                   | 1,026                  | 2,580                  | 10,742                 | 2,216                  | 2,130                  | <0,5                  | 30,121                | 12401,510             | 217,416               | <0,5                  | 38,247                |
| 29          | <0,1                   | 0,234                  | 1,044                  | 15,064                 | 1,008                  | 0,336                  | <0,5                  | 21,034                | 8307,283              | 226,555               | <0,5                  | <0,5                  |
| 30          | <0,1                   | 0,856                  | 0,224                  | 1,198                  | 0,380                  | 0,244                  | <0,5                  | <0,5                  | 11169,524             | 230,993               | <0,5                  | <0,5                  |
| 31          | <0,1                   | 1,264                  | 0,242                  | 3,268                  | 0,602                  | 0,208                  | <0,5                  | 64,920                | 11828,832             | 253,661               | <0,5                  | 40,596                |
| 32          | <0,1                   | 1,300                  | 0,418                  | 1,522                  | 0,896                  | 0,338                  | <0,5                  | 58,814                | 10328,905             | 225,211               | <0,5                  | 37,751                |
| 33          | <0,1                   | 1,326                  | 0,260                  | 0,906                  | 0,828                  | 0,394                  | <0,5                  | 46,556                | 9904,417              | 216,051               | <0,5                  | 33,619                |
| 34          | <0,1                   | 2,058                  | 0,714                  | 7,200                  | 3,980                  | 1,220                  | <0,5                  | 47,735                | 13351,254             | 247,230               | <0,5                  | 45,862                |
| 35          | <0,1                   | 9,450                  | 1,052                  | 5,018                  | 5,078                  | 1,202                  | <0,5                  | 73,457                | 11457,649             | 235,062               | 33,569                | 44,977                |
| 36          | <0,1                   | 10,222                 | 0,520                  | 2,552                  | 1,060                  | 0,786                  | <0,5                  | 60,156                | 9911,558              | 220,265               | <0,5                  | 39,875                |
| 37          | <0,1                   | 0,396                  | 1,972                  | 8,848                  | 43,980                 | 1,280                  | <0,5                  | 39,121                | 16489,709             | 334,858               | <0,5                  | 42,551                |
| 38          | <0,1                   | 1,824                  | 0,534                  | 1,524                  | 0,982                  | 0,332                  | -20,359               | 179,608               | 12668,975             | 261,457               | 9,974                 | 53,577                |
| 39          | <0,1                   | 3,730                  | 0,416                  | 4,278                  | 1,456                  | 0,704                  | -23,043               | 91,345                | 7075,487              | 215,064               | 16,766                | 41,956                |
| 40          | <0,1                   | 1,232                  | 0,182                  | 1,868                  | 0,792                  | 0,190                  | <0,5                  | 123,559               | 11475,016             | 255,766               | <0,5                  | 57,015                |
| 41          | <0,1                   | 1,456                  | 0,636                  | 3,914                  | 1,530                  | 1,180                  | <0,5                  | 74,435                | 10758,065             | 210,403               | <0,5                  | 49,113                |
| 42          | <0,1                   | 9,764                  | 1,440                  | 1,702                  | 3,760                  | 2,440                  | <0,5                  | 88,720                | 11238,456             | 219,987               | <0,5                  | 54,667                |
| 43          | <0,1                   | 6,408                  | 0,932                  | 3,894                  | 2,892                  | 2,758                  | <0,5                  | 80,565                | 13953,488             | 240,864               | <0,5                  | 71,761                |
| 44          | <0,1                   | 0,758                  | 0,162                  | 0,294                  | 0,268                  | 0,158                  | <0,5                  | 42,392                | 10261,255             | 186,822               | <0,5                  | <0,5                  |
| 45          | <0,1                   | 0,696                  | 0,242                  | 1,340                  | 0,390                  | 0,142                  | <0,5                  | 35,437                | 8495,146              | 202,104               | <0,5                  | <0,5                  |
| 46          | <0,1                   | 0,896                  | 0,126                  | 0,816                  | 0,738                  | 0,220                  | <0,5                  | 35,393                | 10034,977             | 213,025               | <0,5                  | <0,5                  |
| 47          | <0,1                   | 1,290                  | 0,170                  | 1,030                  | 1,548                  | 0,718                  | <0,5                  | 34,831                | 9521,484              | 217,041               | <0,5                  | <0,5                  |
| 48          | <0,1                   | 3,952                  | 0,770                  | 0,546                  | 3,188                  | 8,460                  | <0,5                  | 37,342                | 11453,282             | 184,530               | <0,5                  | 105,318               |
| 49          | <0,1                   | 6,620                  | 1,698                  | 12,722                 | 2,484                  | 2,768                  | <0,5                  | 42,848                | 10472,973             | 225,445               | <0,5                  | 49,440                |
| 50          | <0,1                   | 1,148                  | 0,530                  | 4,632                  | 0,586                  | 0,500                  | <0,5                  | 27,126                | 8819,797              | 185,914               | <0,5                  | <0,5                  |

| Sample | Cd (avail.)<br>(mg/kg) | Cu (avail.)<br>(mg/kg) | Fe (avail.)<br>(mg/kg) | Mn (avail.)<br>(mg/kg) | Pb (avail.)<br>(mg/kg) | Zn (avail.)<br>(mg/kg) | Cd (total)<br>(mg/kg) | Cu (total)<br>(mg/kg) | Fe (total)<br>(mg/kg) | Mn (total)<br>(mg/kg) | Pb (total)<br>(mg/kg) | Zn (total)<br>(mg/kg) |
|--------|------------------------|------------------------|------------------------|------------------------|------------------------|------------------------|-----------------------|-----------------------|-----------------------|-----------------------|-----------------------|-----------------------|
| 51     | <0,1                   | 0,856                  | 0,778                  | 2,810                  | 0,666                  | 0,474                  | <0,5                  | 87,702                | 10517,639             | 197,659               | <0,5                  | <0,5                  |
| 52     | <0,1                   | 0,750                  | 0,394                  | 2,762                  | 0,812                  | 0,372                  | <0,5                  | 53,303                | 8306,082              | 174,133               | <0,5                  | 32,701                |
| 53     | <0,1                   | 1,334                  | 0,382                  | 0,988                  | 0,596                  | 0,564                  | <0,5                  | 45,230                | 12705,592             | 204,441               | <0,5                  | 50,493                |
| 54     | <0,1                   | 1,056                  | 0,404                  | 2,802                  | 0,420                  | 0,672                  | <0,5                  | 39,360                | 11467,677             | 173,832               | <0,5                  | 41,757                |
| 55     | <0,1                   | 5,312                  | 1,104                  | 8,668                  | 1,866                  | 2,132                  | <0,5                  | 48,563                | 9777,995              | 192,132               | <0,5                  | 45,299                |
| 56     | <0,1                   | 1,078                  | 0,232                  | 1,264                  | 1,136                  | 0,564                  | <0,5                  | <0,5                  | 9481,147              | 229,121               | <0,5                  | <0,5                  |
| 57     | <0,1                   | 1,056                  | 0,444                  | 3,416                  | 1,146                  | 0,584                  | <0,5                  | 33,536                | 10216,464             | 211,135               | <0,5                  | <0,5                  |
| 58     | <0,1                   | 0,556                  | 1,106                  | 6,268                  | 0,912                  | 0,376                  | -23,939               | 28,299                | 6481,573              | 119,529               | 16,124                | 17,275                |
| 59     | <0,1                   | 0,874                  | 0,384                  | 1,904                  | 0,524                  | 0,454                  | <0,5                  | <0,5                  | 10302,288             | 177,696               | <0,5                  | <0,5                  |
| 60     | <0,1                   | 1,380                  | 0,478                  | 3,246                  | 0,372                  | 0,512                  | <0,5                  | <0,5                  | 12043,796             | 190,610               | <0,5                  | <0,5                  |
| 61     | <0,1                   | 11,888                 | 0,666                  | 7,144                  | 1,422                  | 0,488                  | <0,5                  | 44,782                | 11183,583             | 188,673               | <0,5                  | <0,5                  |
| 62     | <0,1                   | 19,318                 | 1,228                  | 4,786                  | 1,424                  | 0,738                  | <0,5                  | 134,411               | 11558,880             | 181,387               | <0,5                  | 61,374                |
| 63     | <0,1                   | 3,018                  | 0,316                  | 1,682                  | 1,010                  | 0,548                  | <0,5                  | 63,601                | 10469,401             | 237,264               | <0,5                  | 45,258                |
| 64     | <0,1                   | 1,168                  | 0,352                  | 1,694                  | 0,682                  | 0,230                  | <0,5                  | 47,537                | 9444,619              | 201,443               | <0,5                  | <0,5                  |
| 65     | <0,1                   | 0,466                  | 0,664                  | 5,608                  | 0,576                  | 0,292                  | <0,5                  | 37,096                | 7656,944              | 168,675               | <0,5                  | <0,5                  |
| 66     | <0,1                   | 15,644                 | 0,358                  | 1,560                  | 0,550                  | 0,430                  | <0,5                  | 70,694                | 10620,644             | 194,242               | 8,629                 | 35,513                |
| 67     | <0,1                   | 4,860                  | 0,460                  | 1,250                  | 0,876                  | 0,678                  | <0,5                  | 41,870                | 8070,432              | 163,340               | <0,5                  | <0,5                  |
| 68     | <0,1                   | 2,652                  | 9,500                  | 3,892                  | 0,610                  | 1,554                  | <0,5                  | 41,640                | 6310,625              | 131,063               | <0,5                  | <0,5                  |

Table S6. Correlations between the variables studied.

|                   | sand                 | silt and clay        | Dr                   | Humidity             | OC                   | TN                   | C/N                | CaCO <sub>3</sub>    | pH                  | EC                   | Pavail.             | CEC                 | Kasim               | Mgavail.            | Naavail. | Cuavail             | Fe avail.           | Mnavail             | Znavail             | Cutotal             | Fetotal             | Mntotal             | Zntotal |
|-------------------|----------------------|----------------------|----------------------|----------------------|----------------------|----------------------|--------------------|----------------------|---------------------|----------------------|---------------------|---------------------|---------------------|---------------------|----------|---------------------|---------------------|---------------------|---------------------|---------------------|---------------------|---------------------|---------|
| sand              | 1                    |                      |                      |                      |                      |                      |                    |                      |                     |                      |                     |                     |                     |                     |          |                     |                     |                     |                     |                     |                     |                     |         |
| silt and clay     | <b><u>-0.999</u></b> | 1                    |                      |                      |                      |                      |                    |                      |                     |                      |                     |                     |                     |                     |          |                     |                     |                     |                     |                     |                     |                     |         |
| Dr                | 0.162                | -0.164               | 1                    |                      |                      |                      |                    |                      |                     |                      |                     |                     |                     |                     |          |                     |                     |                     |                     |                     |                     |                     |         |
| Humidity          | <b><u>-0.326</u></b> | <b><u>0.328</u></b>  | <b><u>-0.743</u></b> | 1                    |                      |                      |                    |                      |                     |                      |                     |                     |                     |                     |          |                     |                     |                     |                     |                     |                     |                     |         |
| OC                | -0.007               | 0.006                | -0.152               | -0.045               | 1                    |                      |                    |                      |                     |                      |                     |                     |                     |                     |          |                     |                     |                     |                     |                     |                     |                     |         |
| TN                | -0.025               | 0.031                | -0.089               | -0.077               | <b><u>0.461</u></b>  | 1                    |                    |                      |                     |                      |                     |                     |                     |                     |          |                     |                     |                     |                     |                     |                     |                     |         |
| C/N               | 0.017                | -0.022               | -0.062               | -0.008               | <b><u>0.684</u></b>  | -0.205               | 1                  |                      |                     |                      |                     |                     |                     |                     |          |                     |                     |                     |                     |                     |                     |                     |         |
| CaCO <sub>3</sub> | 0.023                | -0.03                | -0.021               | -0.084               | -0.131               | <b><u>-0.241</u></b> | 0.117              | 1                    |                     |                      |                     |                     |                     |                     |          |                     |                     |                     |                     |                     |                     |                     |         |
| pH                | 0.169                | -0.166               | -0.009               | -0.16                | <b><u>0.285</u></b>  | <b><u>0.433</u></b>  | 0.102              | 0.043                | 1                   |                      |                     |                     |                     |                     |          |                     |                     |                     |                     |                     |                     |                     |         |
| EC                | -0.179               | 0.182                | 0.123                | 0.043                | <b><u>-0.364</u></b> | <b><u>-0.341</u></b> | -0.041             | -0.102               | <b><u>-0.41</u></b> | 1                    |                     |                     |                     |                     |          |                     |                     |                     |                     |                     |                     |                     |         |
| Pavail.           | -0.057               | 0.057                | -0.057               | 0.037                | 0.208                | <b><u>0.252</u></b>  | 0.003              | -0.166               | 0.068               | -0.119               | 1                   |                     |                     |                     |          |                     |                     |                     |                     |                     |                     |                     |         |
| CEC               | <b><u>-0.535</u></b> | <b><u>0.539</u></b>  | -0.079               | 0.131                | <b><u>0.253</u></b>  | <b><u>0.41</u></b>   | -0.032             | <b><u>-0.239</u></b> | 0.1                 | -0.067               | <b><u>0.301</u></b> | 1                   |                     |                     |          |                     |                     |                     |                     |                     |                     |                     |         |
| Kavail.           | -0.097               | 0.098                | -0.002               | 0.349                | 0.168                | <b><u>0.362</u></b>  | -0.037             | -0.152               | <b><u>0.335</u></b> | <b><u>-0.295</u></b> | 0.004               | 0.105               | 1                   |                     |          |                     |                     |                     |                     |                     |                     |                     |         |
| Mgavail.          | -0.111               | 0.108                | 0.152                | -0.115               | 0.021                | 0.069                | 0.054              | -0.104               | 0.014               | 0.029                | 0.131               | 0.114               | <b><u>0.402</u></b> | 1                   |          |                     |                     |                     |                     |                     |                     |                     |         |
| Na avail.         | -0.004               | 0.003                | 0.166                | -0.104               | -0.013               | -0.128               | 0.15               | 0.002                | -0.203              | 0.103                | -0.0308             | -0.122              | -0.01               | <b><u>0.571</u></b> | 1        |                     |                     |                     |                     |                     |                     |                     |         |
| Cu avail.         | -0.162               | 0.162                | -0.123               | 0.079                | <b><u>0.257</u></b>  | <b><u>0.285</u></b>  | 0.126              | -0.004               | 0.118               | -0.151               | -0.013              | <b><u>0.241</u></b> | <b><u>0.277</u></b> | 0.06                | -0.036   | 1                   |                     |                     |                     |                     |                     |                     |         |
| Fe avail.         | <b><u>0.396</u></b>  | <b><u>-0.397</u></b> | 0.154                | -0.234               | <b><u>0.349</u></b>  | <b><u>0.345</u></b>  | 0.188              | 0.116                | <b><u>0.324</u></b> | <b><u>-0.319</u></b> | 0.03                | 0.092               | 0.129               | -0.092              | -0.091   | 0.143               | 1                   |                     |                     |                     |                     |                     |         |
| Mnasim            | 0.191                | -0.188               | 0.167                | <b><u>-0.348</u></b> | <b><u>0.489</u></b>  | <b><u>0.513</u></b>  | 0.194              | -0.05                | <b><u>0.365</u></b> | <b><u>-0.372</u></b> | 0.118               | 0.254               | <b><u>0.259</u></b> | -0.017              | -0.125   | <b><u>0.246</u></b> | <b><u>0.371</u></b> | 1                   |                     |                     |                     |                     |         |
| Zn avail.         | -0.016               | 0.016                | 0.195                | -0.209               | <b><u>0.382</u></b>  | <b><u>0.37</u></b>   | <b><u>0.27</u></b> | <b><u>-0.276</u></b> | 0.178               | 0.234                | <b><u>0.377</u></b> | 0.172               | 0.109               | 0.156               | -0.066   | 0.22                | <b><u>0.342</u></b> | <b><u>0.275</u></b> | 1                   |                     |                     |                     |         |
| Cutotal           | -0.013               | 0.014                | -0.149               | -0.037               | 0.141                | <b><u>0.337</u></b>  | -0.066             | -0.181               | 0.187               | -0.026               | <b><u>0.542</u></b> | 0.26                | 0.161               | <b><u>0.279</u></b> | 0.029    | 0.108               | -0.007              | 0.234               | 0.163               | 1                   |                     |                     |         |
| Fetotal           | <b><u>-0.253</u></b> | <b><u>0.254</u></b>  | -0.138               | -0.027               | <b><u>0.35</u></b>   | <b><u>0.361</u></b>  | 0.065              | <b><u>-0.511</u></b> | 0.167               | -0.07                | 0.324               | <b><u>0.538</u></b> | 0.195               | <b><u>0.252</u></b> | -0.06    | 0.13                | -0.053              | 0.294               | <b><u>0.403</u></b> | <b><u>0.288</u></b> | 1                   |                     |         |
| Mntotal           | -0.133               | 0.131                | -0.058               | 0.025                | <b><u>0.267</u></b>  | <b><u>0.349</u></b>  | -0.045             | <b><u>-0.563</u></b> | 0.087               | -0.208               | 0.237               | <b><u>0.376</u></b> | <b><u>0.356</u></b> | 0.183               | -0.041   | -0.035              | -0.041              | <b><u>0.251</u></b> | <b><u>0.27</u></b>  | <b><u>0.245</u></b> | <b><u>0.695</u></b> | 1                   |         |
| Zntotal           | <b><u>-0.238</u></b> | <b><u>0.239</u></b>  | -0.007               | -0.04                | <b><u>0.384</u></b>  | <b><u>0.474</u></b>  | 0.137              | <b><u>-0.371</u></b> | <b><u>0.256</u></b> | 0.037                | <b><u>0.455</u></b> | <b><u>0.406</u></b> | <b><u>0.37</u></b>  | <b><u>0.267</u></b> | -0.121   | 0.233               | 0.026               | 0.233               | <b><u>0.554</u></b> | <b><u>0.647</u></b> | <b><u>0.517</u></b> | <b><u>0.526</u></b> | 1       |

Underlined p < 0.05; **Bold** p < 0.01; **Underlined and bold** p < 0.001
